# Supplementary material
Source: publisher site journal article supplement (https://www.dovepress.com/article/402247)
Supplement: Supplementary file 1 [file get_supplementary_file.php]

**Supplementary**

**Table S1.** Antibody details and dilution ratios.

| Antibody name | Catalog number | Dilution ratio |
| --- | --- | --- |
| Gapdh (HRP conjugate) | HRP-60004 (Proteintech) | 1:2000 |
| Anti-hnRNPA1 antibody | Ab5832 (abcam) | 1:1000 |
| Phospho-p44/42MAPK (Erk1/2) (Thr202/Tyr204) | 4370T (CST) | 1:1000 |
| p44/42 MAPK (Erk1/2) | 4695T (CST) | 1:1000 |
| PhosphoMEK1/2  (Ser217/221) | 9154T (CST) | 1:1000 |
| MEK1/2 antibody  Anti-mouse IgG  Anti-rabbit IgG | 9122S (CST)  7076 (CST)  7074P2 (CST) | 1:1000  1:2000  1:2000 |


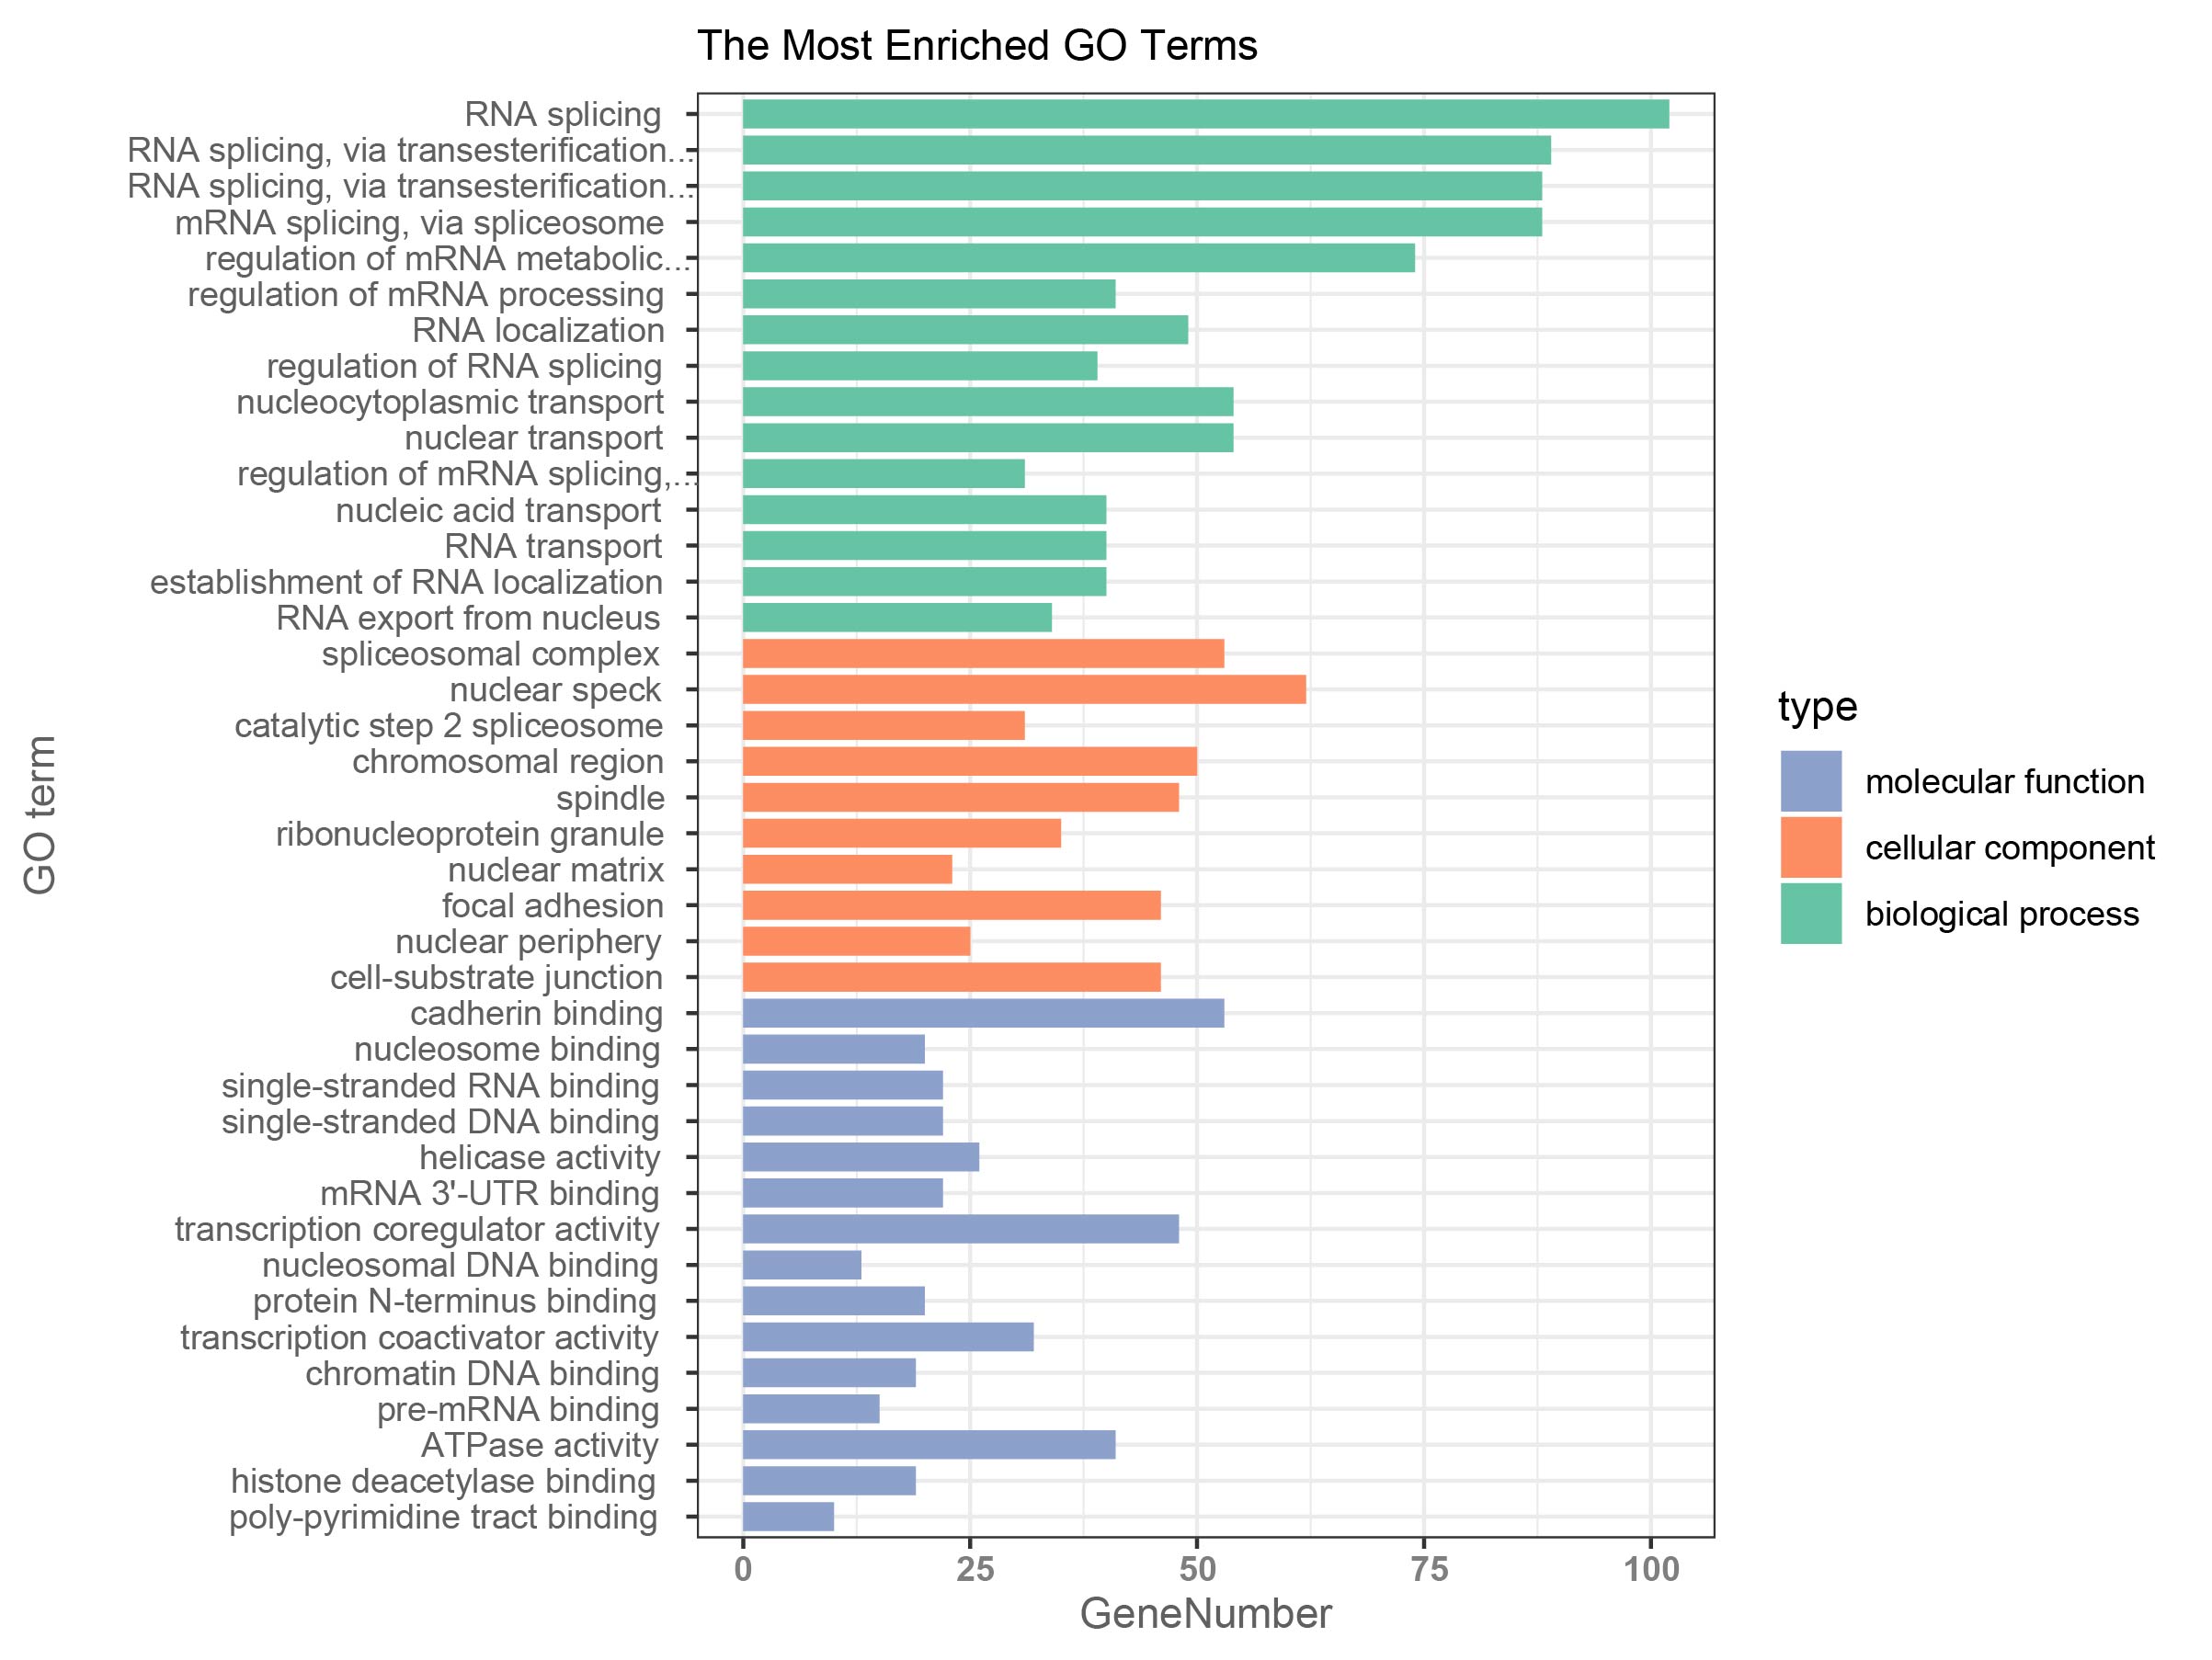


**Figure S1**. GO Enrichment analysis.


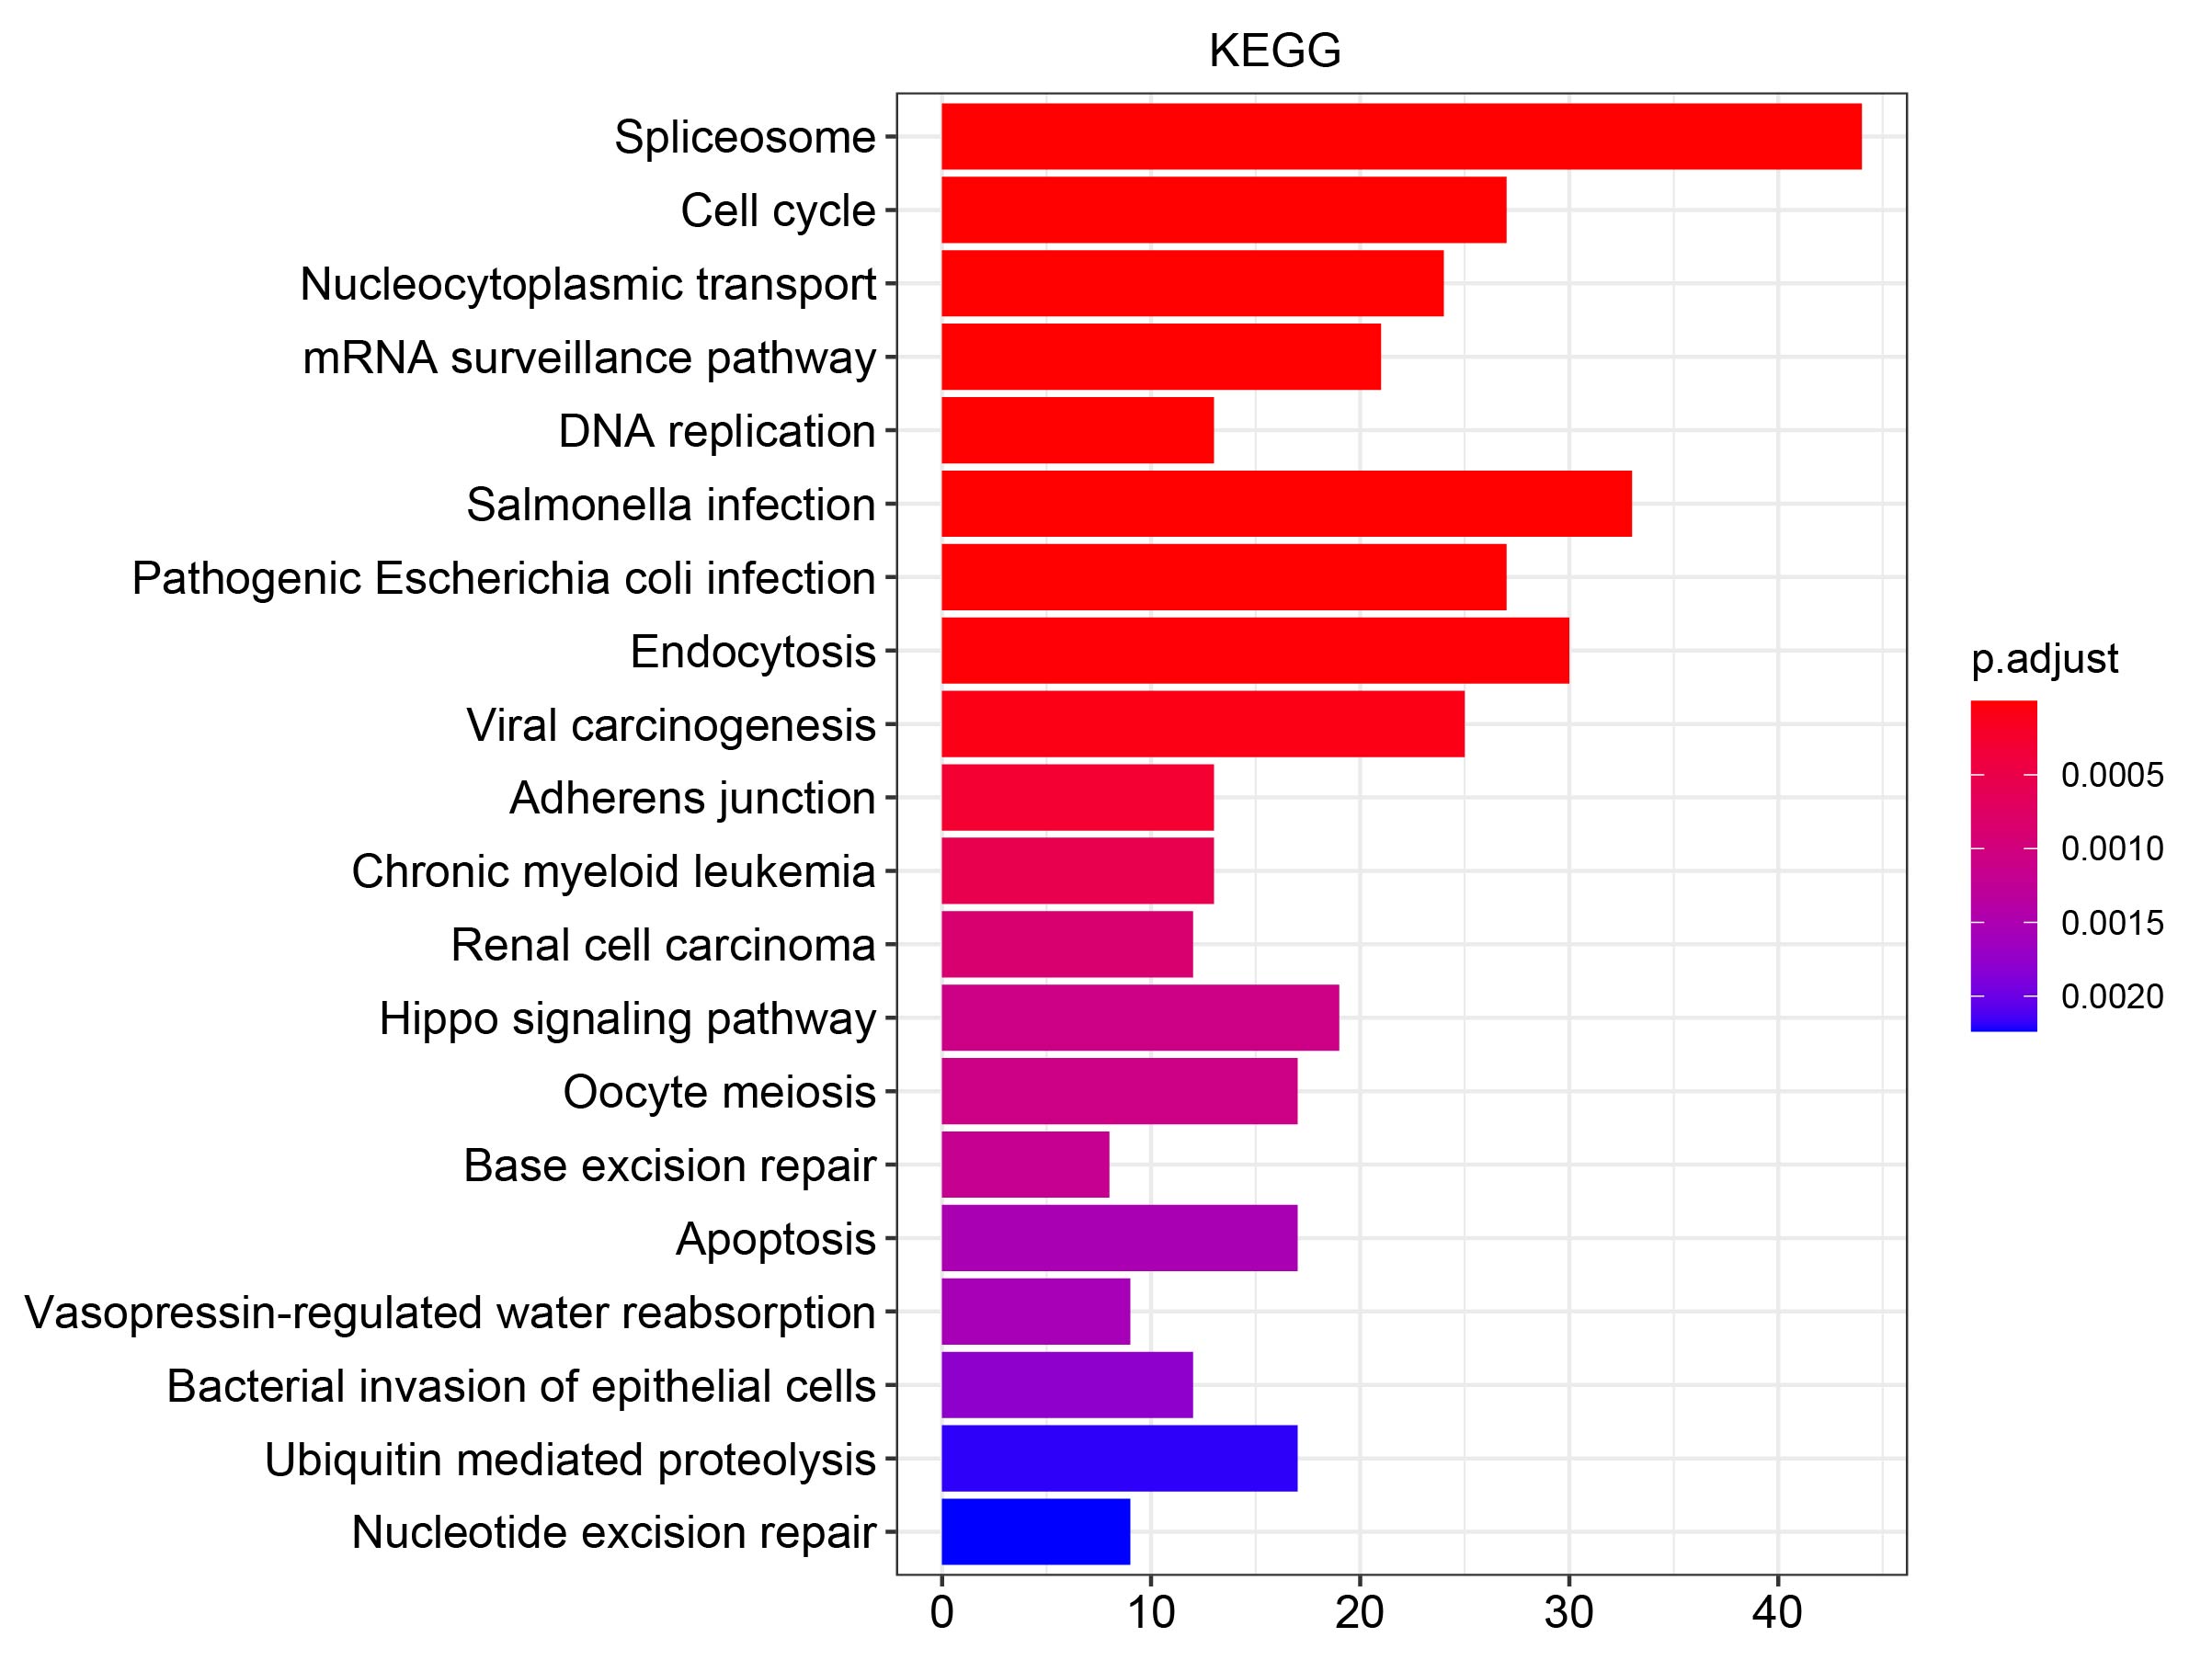


**Figure S2.** Kyoto encyclopedia of genes and genomes analysis.


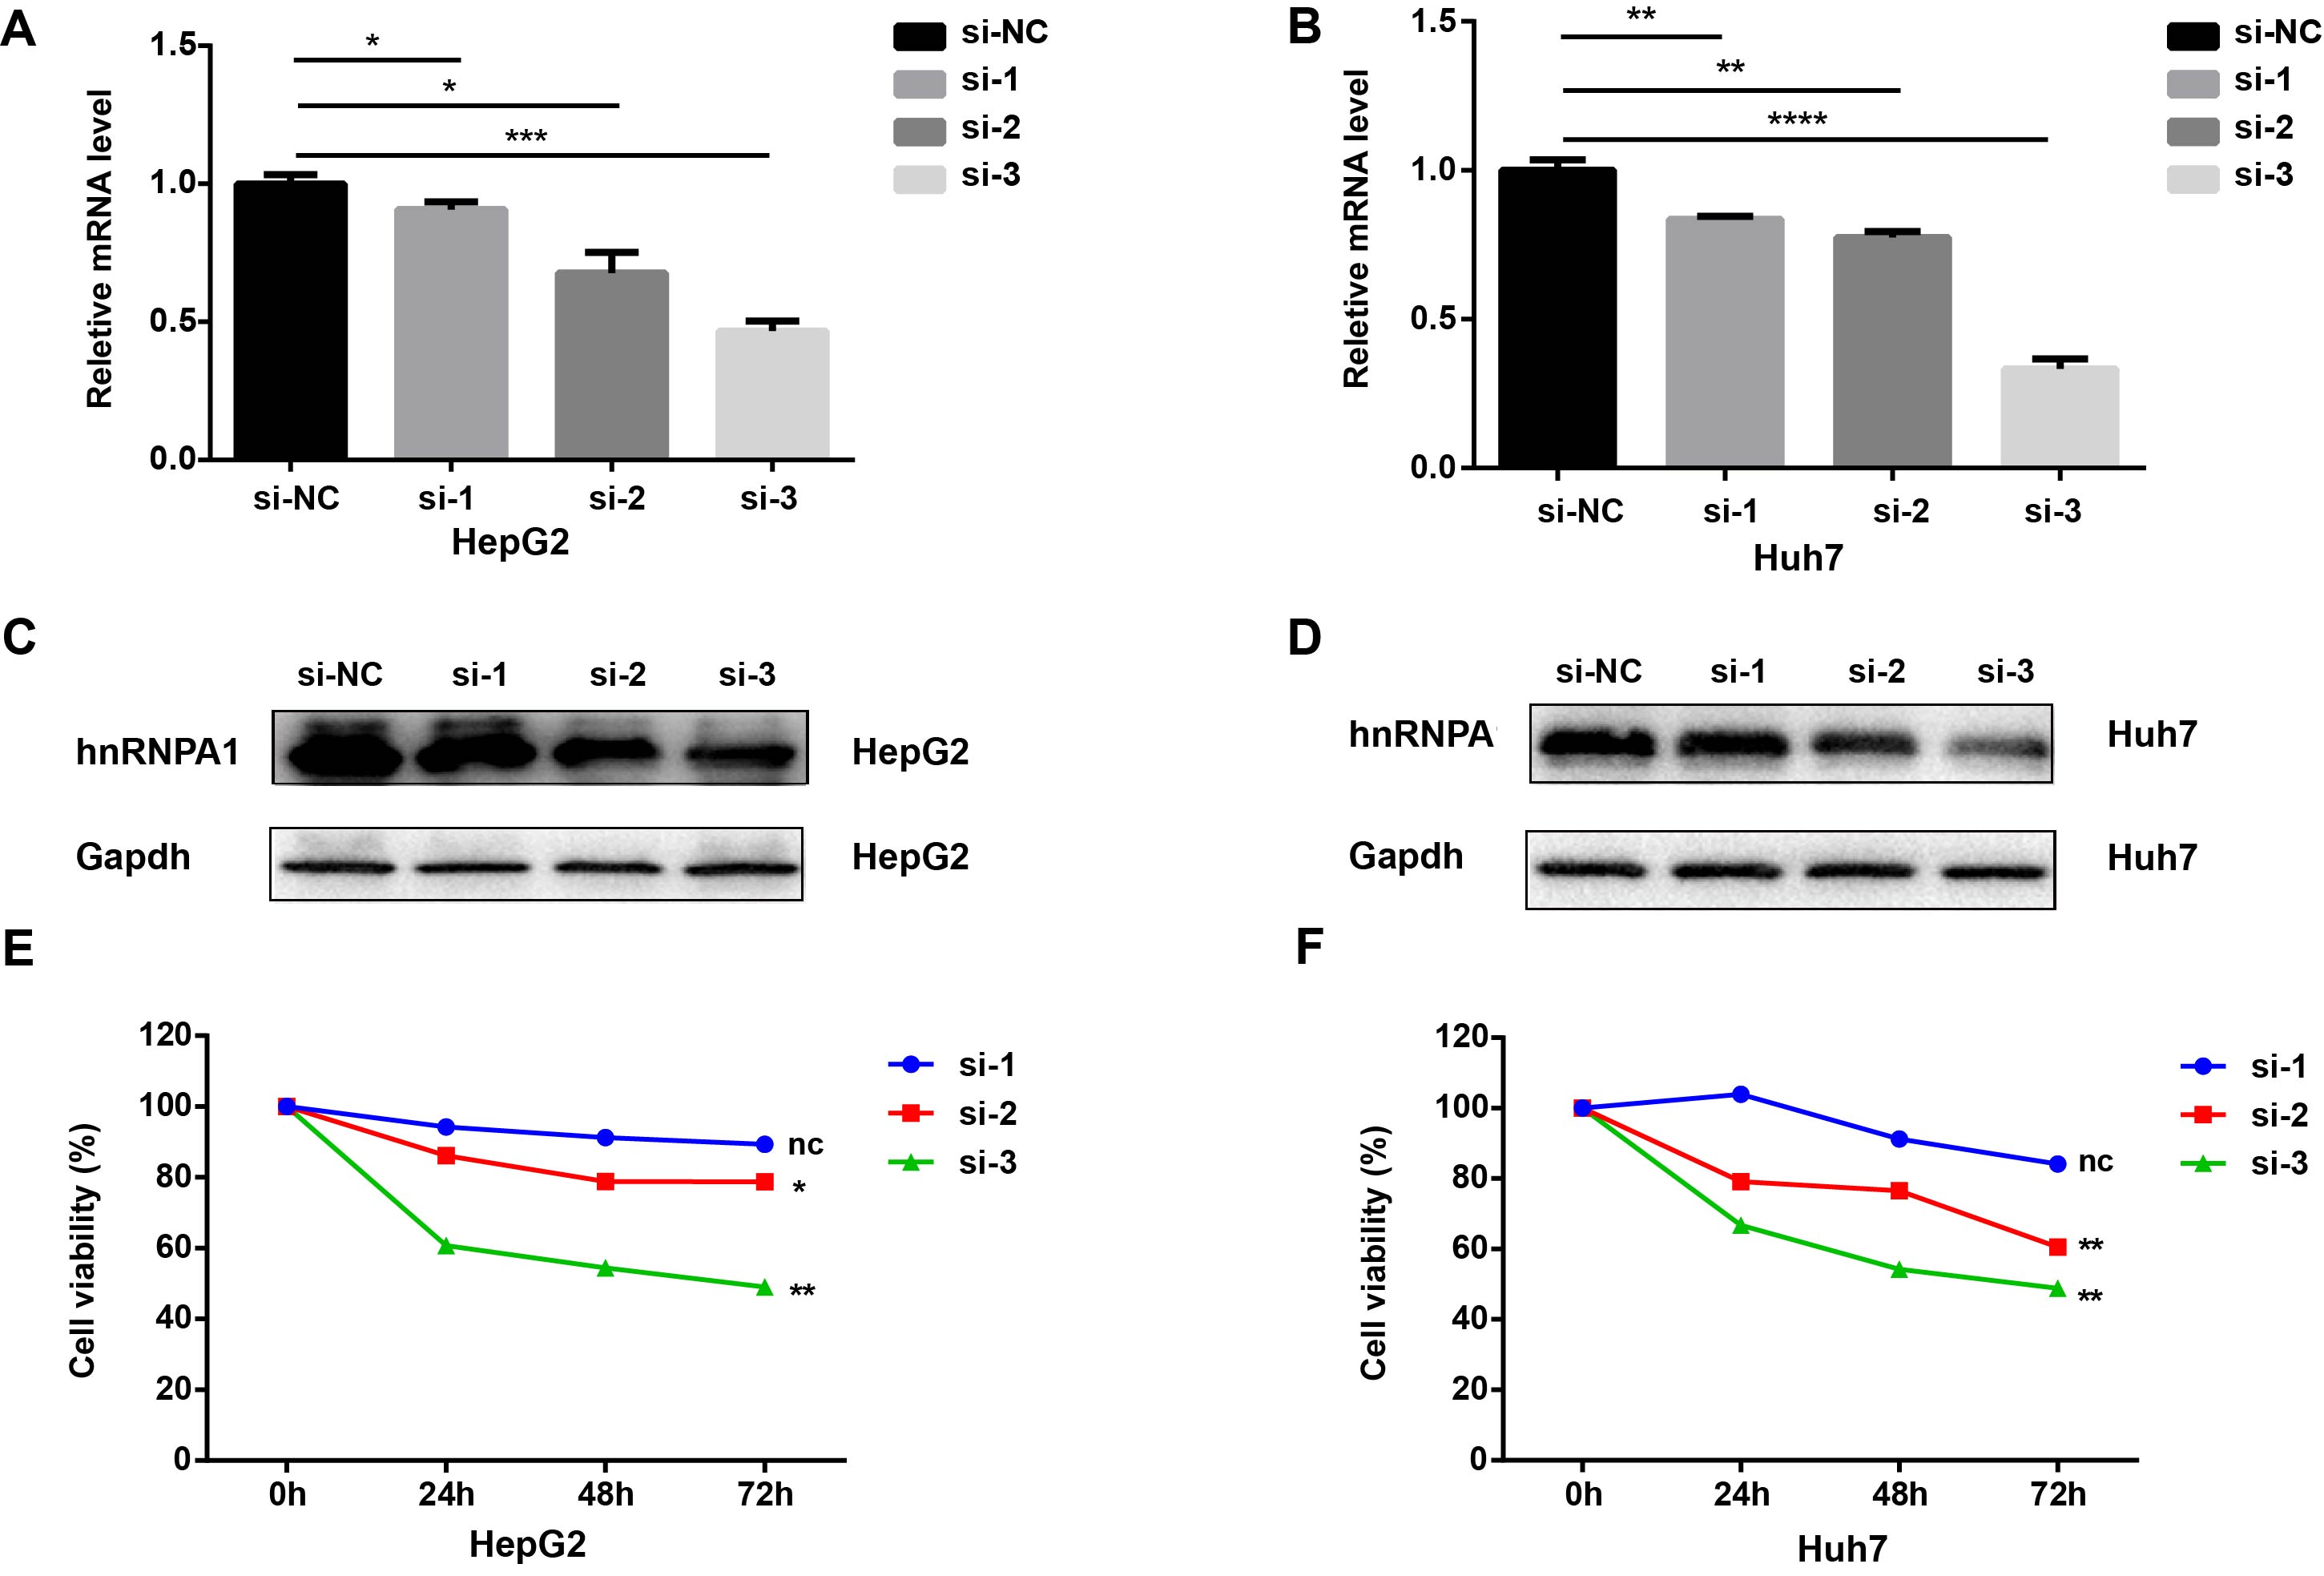


**Figure S3.** Screening of si-RNA knockdown effect. **A-B.** Relative hnRNPA1 expression level in HepG2 (**A**) and Huh7 (**B**) cells transfected with si-RNAs targeting hnRNPA1 by qRT-PCR. **C-D.** HnRNPA1 protein expression level in HepG2 (**C**) and Huh7 (**D**) cells transfected with si-RNAs targeting hnRNPA1. **E-F.** Proliferation of HepG2 (**E**) and Huh7 (**F**) cells after knockdown of hnRNPA1 by CCK-8. Data are expressed as the means ± SD from three independent experiments. Nc: no statistical significance, **P* < 0.05, ***P* < 0.01, ****P* < 0.001 and **** *P* < 0.0001.


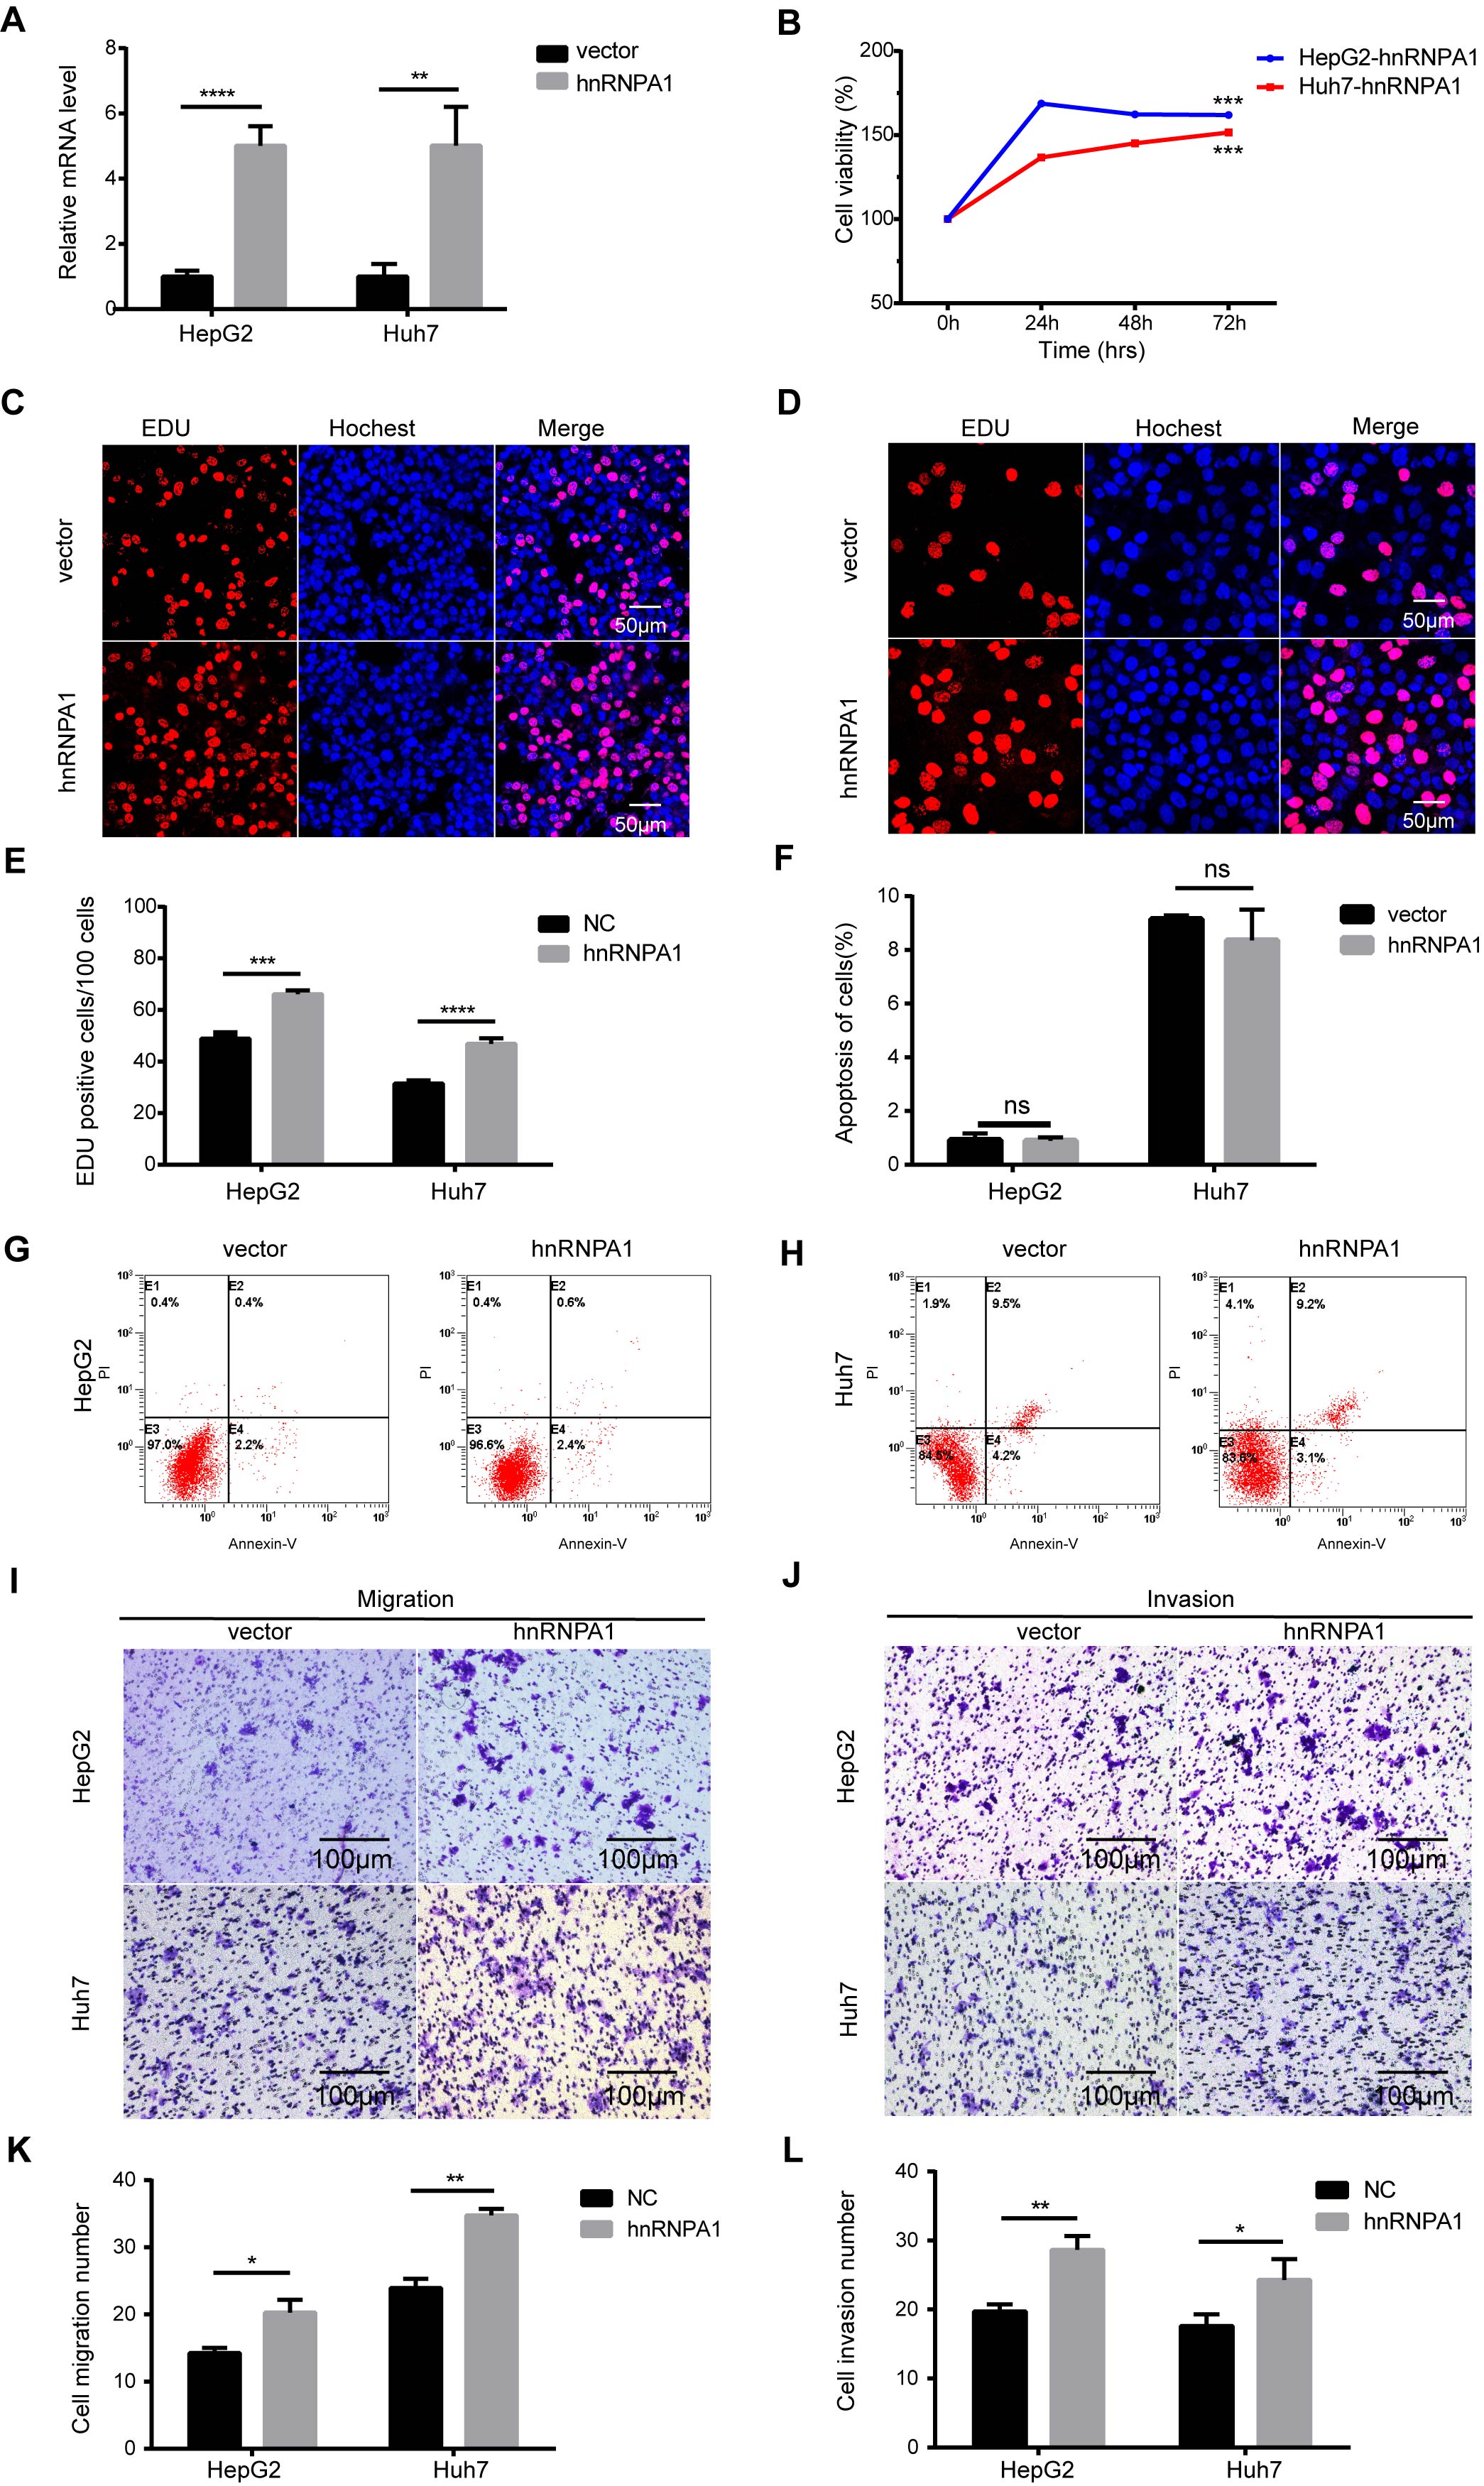


**Figure S4.** Overexpression of hnRNPA1 promotes the proliferation, migration, and invasion of HCC cells. (**A**). Relative hnRNPA1 expression level in HepG2 and Huh7 cells after hnRNPA1 overexpression by q-PCR. **B-E**. Proliferation of HepG2 and Huh7 cells after hnRNPA1 overexpression by CCK-8 (**B**) and EDU assay (**C-E**), scale bar = 50 μm. **F-H**. Representative results and statistical analysis of apoptosis in HepG2 (**G**) and Huh7 cells (**H**). **I-L**. Representative results and statistical analysis of the transwell assay (scale bar = 100 μm) in HepG2 and Huh7 cells after overexpression of hnRNPA1. Data are expressed as the means ± SD from three independent experiments. Nc: no statistical significance, **P* < 0.05, ***P* < 0.01, ****P* < 0.001 and **** *P* < 0.0001.
